# Supplementary material
Source: HighWire-hosted journal article supplement (https://bmjophth.bmj.com/content/1/1/e000004)
Supplement: inline-supplementary-material-1 [file inline-supplementary-material-1.docx]

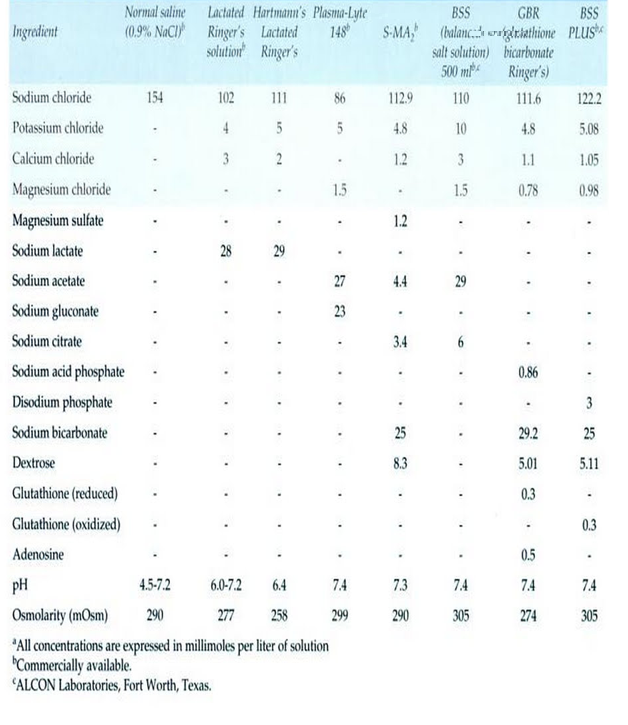
Table 1: Comparing the electrolyte composition of several fluids used for intraocular surgery.


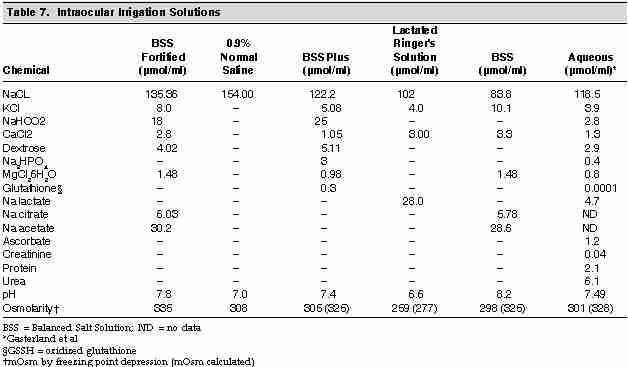


Table 2: comparing the solutes of a number of fluids for intraocular surgery to aqueous

**References:**

1 Phacoemulsification surgery,

Editors Vajpayee R, Sharma N, Pandey S, Titiyal J; Jaypee Bros; chapter 6,p 57

2-Intraocular Irrigating Solutions. A Clinical Study of BSS Plus® and Dextrose Bicarbonate Fortified BSS® as an Infusate during Pars Plana Vitrectomy
[M Samuel](http://www.ijo.in/searchresult.asp?search=&author=Michael+A+Samuel&journal=Y&but_search=Search&entries=10&pg=1&s=0), [U Desai](http://www.ijo.in/searchresult.asp?search=&author=Uday+R+Desai&journal=Y&but_search=Search&entries=10&pg=1&s=0), [I Strassman](http://www.ijo.in/searchresult.asp?search=&author=I+Strassman&journal=Y&but_search=Search&entries=10&pg=1&s=0), [M Abusamak](http://www.ijo.in/searchresult.asp?search=&author=M+Abusamak&journal=Y&but_search=Search&entries=10&pg=1&s=0)

Indian Journal of Ophthalmol ;2003 51 3:237-242
